# Supplementary material for: Influence of Experimental Parameters of a Continuous Flow Process on the Properties of Very Small Iron Oxide Nanoparticles (VSION) Designed for T1-Weighted Magnetic Resonance Imaging (MRI)
Source: PubMed Central journal article supplement (PMC7221927; doi:10.3390/nano10040757), 2020-04-15
Supplement: nanomaterials-10-00757-s001.pdf [file nanomaterials-10-00757-s001.pdf]

## Supplementary Material

# Influence of Experimental Parameters of a Continuous Flow Process on the Properties of Very Small Iron Oxide Nanoparticles (VSION) Designed for T1-weighted Magnetic Resonance Imaging (MRI)

Thomas Vangijzegem <sup>1,\*</sup>, Dimitri Stanicki <sup>1</sup>, Adriano Panepinto <sup>2</sup>, Vlad Socoliuc <sup>3</sup>, Ladislau Vekas <sup>3,4</sup>, Robert N. Muller <sup>5</sup> and Sophie Laurent <sup>1,5</sup>

<sup>1</sup> Department of General, Organic and Biomedical Chemistry, NMR and Molecular Imaging Laboratory, University of Mons, B-7000 Mons, Belgium; dimitri.stanicki@umons.ac.be (D.S.); sophie.laurent@umons.ac.be (S.L.)

<sup>2</sup> Chimie des Interactions Plasma-Surface (ChIPS), University of Mons, 23 Place du Parc, B-7000 Mons, Belgium; Adriano.panepinto@umons.ac.be

<sup>3</sup> Laboratory of Magnetic Fluids, Center for Fundamental and Advanced Technical Research, Romanian Academy – Timisoara Branch, 300223 Timisoara, Romania; vsocoliuc@gmail.com (V.S.); vekas.ladislau@gmail.com (L.V.)

<sup>4</sup> Research Center for Complex Fluids Systems Engineering, Politehnica University of Timisoara, M. Viteazu Ave. #1, 300222 Timisoara, Romania

<sup>5</sup> Center for Microscopy and Molecular Imaging, Rue Adrienne Bolland, 8, B-6041 Gosselies, Belgium; robert.muller@umons.ac.be

\* Correspondence: thomas.vangijzegem@umons.ac.be; Tel.: +32-(0)65-373-525

Received: 12 March 2020; Accepted: 30 March 2020; Published: date

**Table S1.** Relaxometric properties of Dotarem®, Resovist® and batch-prepared VSION

| Sample    | 20 MHz                                             |                                                    |                                | 60 MHz                                             |                                                    |                                |
|-----------|----------------------------------------------------|----------------------------------------------------|--------------------------------|----------------------------------------------------|----------------------------------------------------|--------------------------------|
|           | r <sub>1</sub> (s <sup>-1</sup> mM <sup>-1</sup> ) | r <sub>2</sub> (s <sup>-1</sup> mM <sup>-1</sup> ) | r <sub>2</sub> /r <sub>1</sub> | r <sub>1</sub> (s <sup>-1</sup> mM <sup>-1</sup> ) | r <sub>2</sub> (s <sup>-1</sup> mM <sup>-1</sup> ) | r <sub>2</sub> /r <sub>1</sub> |
| VSION     | 5.6                                                | 8.3                                                | 1.48                           | 5.7                                                | 12.8                                               | 2.24                           |
| Dotarem®  | 3.7                                                | 4.4                                                | 1.19                           | 3.1                                                | 3.6                                                | 1.16                           |
| Resovist® | 24.9                                               | 176.8                                              | 7.10                           | 10.9                                               | 190.2                                              | 17.45                          |

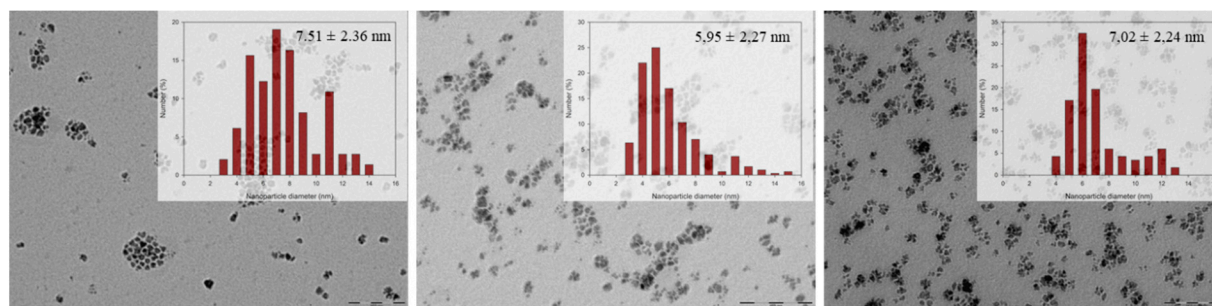

**Figure S1.** TEM images of the nanoparticles obtained through flow synthesis with various equivalents of oleic acid: 4 equivalents (left), 8 equivalents (middle) and 12 equivalents (right) in the 1 mm capillary

reactor. The scale bar corresponds to 100 nm. Insets show the size distributions determined by statistical analysis

**Table S2.** Size and relaxometric properties of VSION synthesized using various surfactant concentrations (oleic acid and oleylamine)

| Oleic acid/Oleylamine/Fe(acac) <sub>3</sub> | D <sub>PCCS</sub> (nm) | D <sub>TEM</sub> (nm) | PDI  | r <sub>2</sub> /r <sub>1</sub> (20 MHz) | r <sub>2</sub> /r <sub>1</sub> (60 MHz) |
|---------------------------------------------|------------------------|-----------------------|------|-----------------------------------------|-----------------------------------------|
| 2/2/1                                       | 10.7                   | 5,48 ± 1,26           | 1.26 | 1.76                                    | 3.03                                    |
| 4/4/1                                       | 7.7                    | 3,73 ± 0,77           | 1.16 | 1.53                                    | 2.43                                    |
| 6/6/1                                       | 10.4                   | 5,86 ± 1,38           | 1.23 | 1.67                                    | 3.1                                     |

**Table S3.** Size and magnetic properties of VSION synthesized using various oleylamine concentrations

| Oleylamine/Fe(acac) <sub>3</sub> | M <sub>SAT</sub> (A·m <sup>2</sup> /kg) | M <sub>SAT</sub> <sup>NMRD</sup> (A·m <sup>2</sup> /kg) | D <sub>NMRD</sub> (nm) |
|----------------------------------|-----------------------------------------|---------------------------------------------------------|------------------------|
| 4/1                              | 29.4                                    | 24.9                                                    | 9.98                   |
| 8/1                              | 28.1                                    | 25.5                                                    | 8.78                   |
| 12/1                             | 40.1                                    | 35.9                                                    | 8.34                   |

**Table S4.** size and relaxometric properties of VSION synthesized at different temperatures using continuous flow process

| Temperature (°C) | D <sub>PCCS</sub> (nm) | M <sub>SAT</sub> (A·m <sup>2</sup> /kg) | D <sub>NMRD</sub> (nm) | D <sub>TEM</sub> (nm) |
|------------------|------------------------|-----------------------------------------|------------------------|-----------------------|
| 200              | 6.5                    | 11.7                                    | 7.2                    | 3.54 ± 0.76           |
| 225              | 7.9                    | 22                                      | 6.8                    | 3.68 ± 0.60           |
| 250              | 7.7                    | 33.9                                    | 6.2                    | 3.73 ± 0.77           |
| 275              | 9.2                    | 37.7                                    | 6                      | 3.53 ± 0.54           |
| 300              | 8                      | 41.7                                    | 6.3                    | 3.74 ± 0.55           |

**Table S5.** size and magnetic properties of VSION synthesized using different BPR

| BPR     | D <sub>PCCS</sub> (nm) | M <sub>SAT</sub> (A·m <sup>2</sup> /kg) | D <sub>NMRD</sub> (nm) | D <sub>TEM</sub> (nm) |
|---------|------------------------|-----------------------------------------|------------------------|-----------------------|
| 5 psi   | 8.6                    | ---                                     | ---                    | ---                   |
| 20 psi  | 6.7                    | ---                                     | ---                    | ---                   |
| 40 psi  | 7.7                    | 33.9                                    | 6.2                    | 3.73 ± 0.77           |
| 75 psi  | 7.7                    | 32.3                                    | 6.3                    | 3.91 ± 0.49           |
| 100 psi | 8.9                    | 32.3                                    | 6.3                    | 3.82 ± 0.46           |

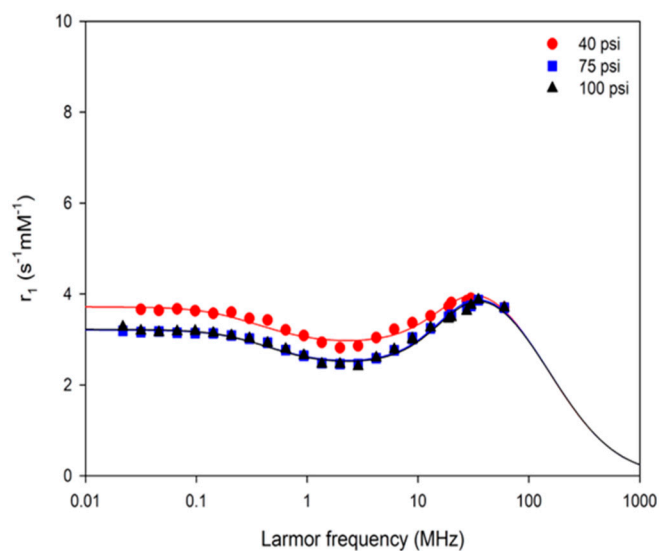

**Figure S2.**  $^1\text{H}$  NMRD profiles of iron oxide nanoparticles obtained at various pressure recorded at 37 °C in THF.

**Table S6.** Magnetic properties extracted from the fitting of the magnetization curves of samples obtained in the 1 mm capillary reactor.

| Flow rate ( $\text{mL}\cdot\text{min}^{-1}$ ) | Magnetometry data |                                          |
|-----------------------------------------------|-------------------|------------------------------------------|
|                                               | D (nm)            | $M_s$ ( $\text{emu}\cdot\text{g}^{-1}$ ) |
| 0.05                                          | $3.89 \pm 0.94$   | 45.2                                     |
| 0.1                                           | $3.94 \pm 0.95$   | 41.9                                     |
| 0.5                                           | $3.61 \pm 0.72$   | 34.5                                     |
| 1                                             | $3.46 \pm 0.4$    | 31.6                                     |
